# Supplementary material
Source: Research Square preprint supplement (doi:10.21203/rs.3.rs-8328385/v2)
Supplement: Supplementary file 1 [file f60a489992e326fcf343b5b5.docx]

**Appendix 1 - Portuguese adaptation of the Course Regarding the Wiki Project Experience questionnaire**

Q1 - O treinamento, os materiais de apoio e as atividades sobre a Wikipédia foram fáceis de entender e úteis.

Q2 - Esta atividade me exigiu que examinasse minhas fontes de informação de forma crítica.

Q3 - Esta atividade me demonstrou como as evidências devem ser utilizadas para fundamentar uma edição na Wikipédia.

Q4 - Esta atividade me exigiu que articulasse o conhecimento existente de forma cuidadosa, para um público leigo poder compreendê-lo.

Q5 - Acredito que aprender a escrever para um público leigo é uma competência relevante e necessária, independentemente da carreira que eu escolher.

Q6 - A atividade na Wikipédia exigiu que eu fizesse uma avaliação crítica dos artigos existentes, buscando informações ausentes ou apresentadas com viés.

Q7 - A tarefa de identificar e corrigir as fragilidades de um artigo foi uma atividade de resolução de problemas que exigiu conhecimento e criatividade.

Q8 - A atividade na Wikipédia contribuiu para a minha transição do papel de consumidor para o de produtor de conhecimento.

Q9 - A atividade na Wikipédia ilustrou para mim como o conhecimento é construído coletivamente e como diferentes vozes podem, ou não, chegar a um consenso sobre um tópico específico.

Q10 - A atividade na Wikipédia agregou mais valor a esta disciplina do que um trabalho acadêmico tradicional.
